# Supplementary material for: A New Ratiometric Fluorescent Probe Based on BODIPY for Highly Selective Detection of Hydrogen Sulfide
Source: MDPI journal article supplement (doi:10.3390/molecules27217499), 2022-11-03

## **Supporting Information**

# **A New Ratiometric Fluorescent Probe Based on BODIPY for Highly Selective Detection of Hydrogen Sulfide**

Huan Xiang, Tianqing Ye\*, Yanbo Li, Yanfei Lin, Dan Liu, Hongwei Zhou, Jianbo Wang\*, Lei Li\*

College of Biological, Chemical Sciences and Engineering, Jiaying University, Jiaying Key Laboratory of  
Molecular Recognition and Sensing, Jiaying 314001, China.

E-mail: yetianqing@163.com; wjb4207@mail.ustc.edu.cn; lei.li@mail.zjxu.edu.cn.

## Table of Contents

|                                                                                                                                                                                                            |         |
|------------------------------------------------------------------------------------------------------------------------------------------------------------------------------------------------------------|---------|
| <b>Table S1.</b> The BODIPY-Based fluorescent probes for detection of H <sub>2</sub> S.                                                                                                                    | S3- S5  |
| <b>Figure S1.</b> The absorption ratio at 568 nm and 516 nm of probe <b>BH</b> (5 μM) toward different concentration of H <sub>2</sub> S in aqueous solution of DMSO/PBS (v/v 1/1, pH 7.4).                | S6      |
| <b>Figure S2.</b> The fluorescence intensity at 568 nm and 516 nm of probe <b>BH</b> (5 μM) toward increasing H <sub>2</sub> S concentration (0–500 μM) in aqueous solution of DMSO/PBS (v/v 1/1, pH 7.4). | S6      |
| <b>Figure S3.</b> Linear relationship of the fluorescence intensity ratio (I <sub>594nm</sub> /I <sub>542nm</sub> ) of probe <b>BH</b> toward H <sub>2</sub> S concentration (0–75 μM).                    | S7      |
| <b>Figure S4.</b> ESI-MS spectrum of reaction product of probe <b>BH</b> with H <sub>2</sub> S.                                                                                                            | S8      |
| <b>Figure S5.</b> The fluorescence intensity ratios (I <sub>594nm</sub> /I <sub>542nm</sub> ) of probe BH (5 μM) in the absence (●) or presence (■) of H <sub>2</sub> S (500 μM) at various pH values.     | S9      |
| Copies of <sup>1</sup> H and <sup>13</sup> C NMR spectra of new compound and probe                                                                                                                         | S10-S12 |
| Reference                                                                                                                                                                                                  | S13-S14 |

**Table S1.** The BODIPY-Based fluorescent probe for detection of H<sub>2</sub>S

| Probe structure                                                                     | Response mode      | Response time                         | Detection limit | Reference |
|-------------------------------------------------------------------------------------|--------------------|---------------------------------------|-----------------|-----------|
| 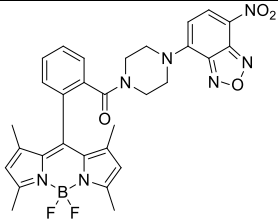   | Turn-on<br>520 nm  | 60 min (100 $\mu$ M H <sub>2</sub> S) | 105 nM          | 37        |
|    | Turn-on<br>520 nm  | 210 s                                 | 6.39 nM         | 26        |
|   | Turn-on<br>587 nm  | 1 min (50 $\mu$ M H <sub>2</sub> S)   | 51 $\mu$ M      | 20        |
|  | Turn-on<br>592 nm  | 20 min (100 $\mu$ M H <sub>2</sub> S) | 1.27 $\mu$ M    | 24        |
|  | Turn-off<br>615 nm | 20 min                                | 0.203 $\mu$ M   | 28        |

|                                                                                     |                    |                                      |              |    |
|-------------------------------------------------------------------------------------|--------------------|--------------------------------------|--------------|----|
| 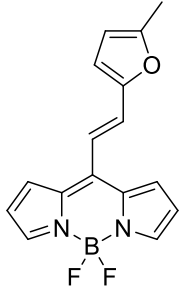   | Turn-on<br>496 nm  | 30 min                               | 99.4 nM      | 22 |
|    | Turn-on<br>627 nm  | 40 min                               | 1.3 $\mu$ M  | 18 |
|   | Turn-on<br>716 nm  | 150 s (150 $\mu$ M H <sub>2</sub> S) | 6.74 $\mu$ M | 19 |
|  | Turn-on<br>685 nm  | 10 min (100 $\mu$ M)                 | 1.15 $\mu$ M | 25 |
|  | Turn-off<br>516 nm | -                                    | 0.17 $\mu$ M | 38 |

|                                                                                     |                                                         |        |              |           |
|-------------------------------------------------------------------------------------|---------------------------------------------------------|--------|--------------|-----------|
| 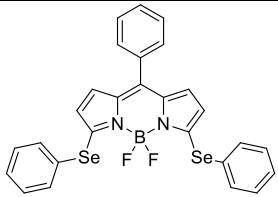   | Turn-off<br>610 nm                                      | 20 min | 2.5 nM       | 39        |
|    | Turn-on<br>510 nm                                       | -      | 2.6 $\mu$ M  | 27        |
|   | Turn-on<br>515 nm                                       | 15 min | 2.05 $\mu$ M | 23        |
|  | Turn-on<br>700 nm                                       | 90 min | 46 nM        | 40        |
|  | Ratiometric<br>fluorescence<br>From 542 nm to<br>594 nm | 60 min | 3.5 $\mu$ M  | This Work |

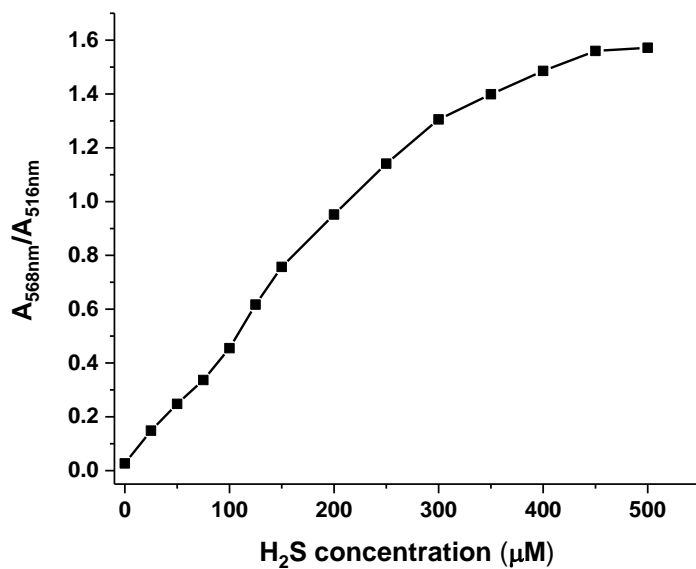

**Figure S1.** The absorption ratio at 568 nm and 516 nm of probe **BH** (5 μM) toward different concentration of H<sub>2</sub>S in aqueous solution of DMSO/PBS (v/v 1/1, pH 7.4), recorded after 60 min.

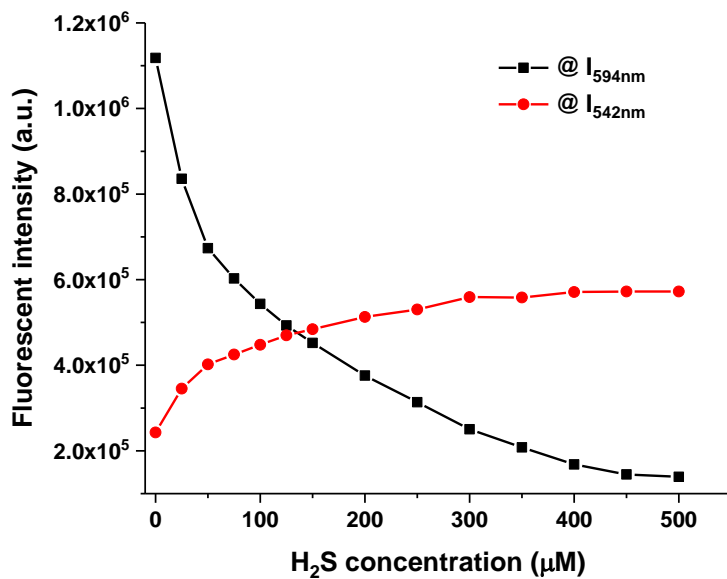

**Figure S2.** The fluorescence intensity at 568 nm and 516 nm of probe **BH** (5 μM) toward increasing H<sub>2</sub>S concentration (0–500 μM) in aqueous solution of DMSO/PBS (v/v 1/1, pH 7.4), recorded after 60 min.

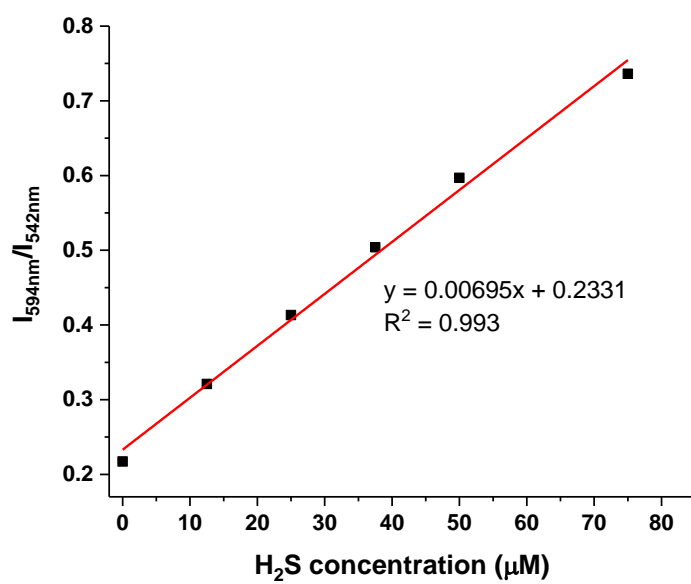

**Figure S3.** Linear relationship of the fluorescence intensity ratio ( $I_{594\text{nm}}/I_{542\text{nm}}$ ) of probe **BH** toward  $\text{H}_2\text{S}$  concentration (0–75  $\mu\text{M}$ ), recorded after 60 min.

## Display Report

### Analysis Info

Analysis Name D:\Data\2020MS\F\0114\bs\_GD3\_01\_691.d  
Method tune\_low\_200-800\_neg-6min.m  
Sample Name bs  
Comment

Acquisition Date 1/13/2020 12:03:48 PM

Operator gftang  
Instrument / Ser# micrOTOF 10257

### Acquisition Parameter

|             |            |                      |          |                  |           |
|-------------|------------|----------------------|----------|------------------|-----------|
| Source Type | ESI        | Ion Polarity         | Negative | Set Nebulizer    | 0.4 Bar   |
| Focus       | Not active |                      |          | Set Dry Heater   | 200 °C    |
| Scan Begin  | 100 m/z    | Set Capillary        | 4000 V   | Set Dry Gas      | 4.0 l/min |
| Scan End    | 1000 m/z   | Set End Plate Offset | -500 V   | Set Divert Valve | Waste     |

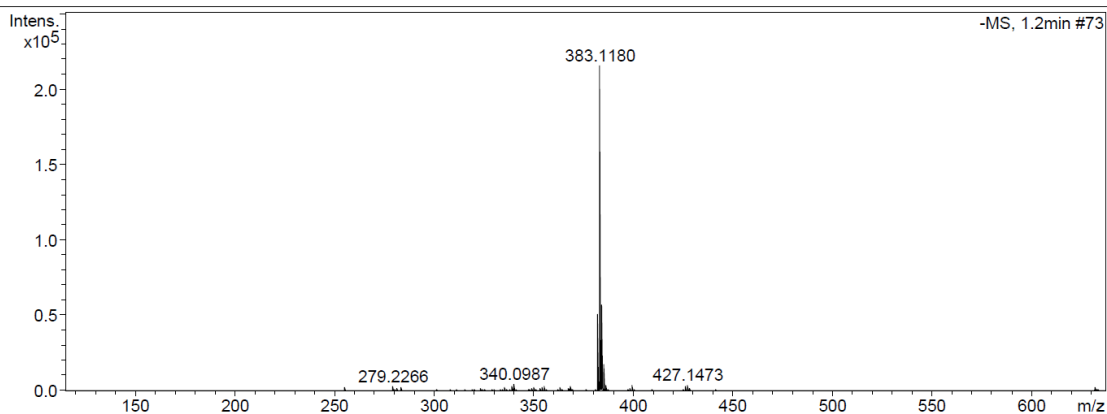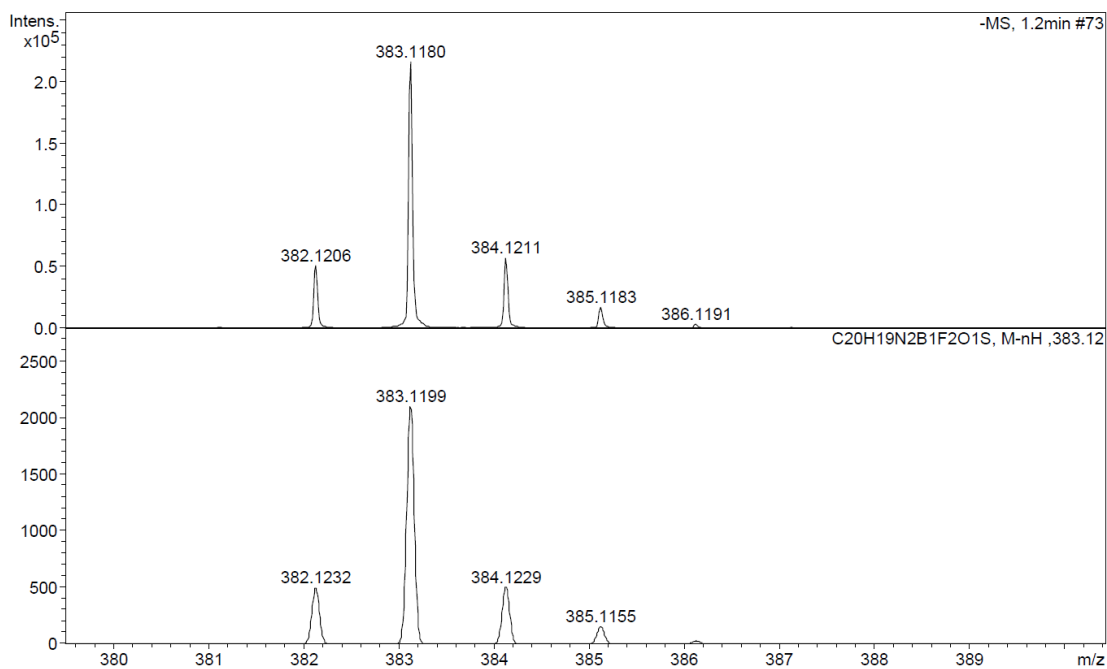

**Figure S4.** ESI-MS spectrum of reaction product of probe **BH** with H<sub>2</sub>S.



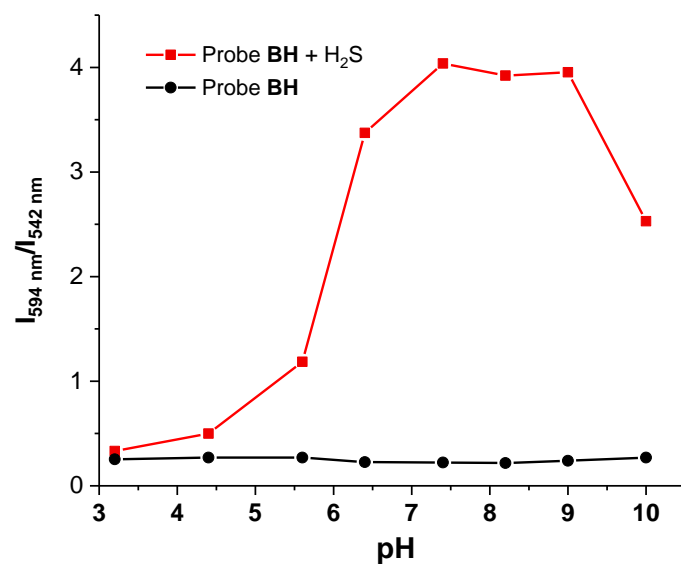

**Figure S5.** The fluorescence intensity ratios ( $I_{594\text{ nm}}/I_{542\text{ nm}}$ ) of probe **BH** (5  $\mu\text{M}$ ) in the absence (●) or presence (■) of H<sub>2</sub>S (500  $\mu\text{M}$ ) at various pH values, recorded after 60 min.

# Copies of $^1\text{H}$ and $^{13}\text{C}$ NMR spectra of new compounds

$^1\text{H}$  NMR spectra (400 MHz) of compound **2** in  $\text{CDCl}_3$  solution

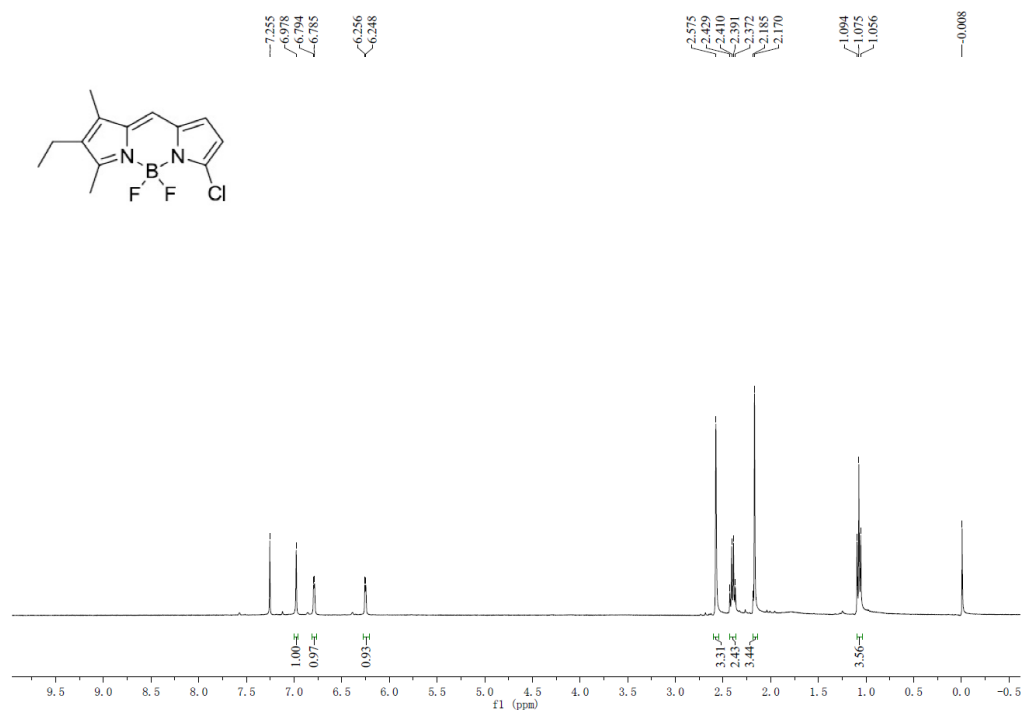

$^{13}\text{C}$  NMR spectra (100 MHz) of compound **2** in  $\text{CDCl}_3$  solution

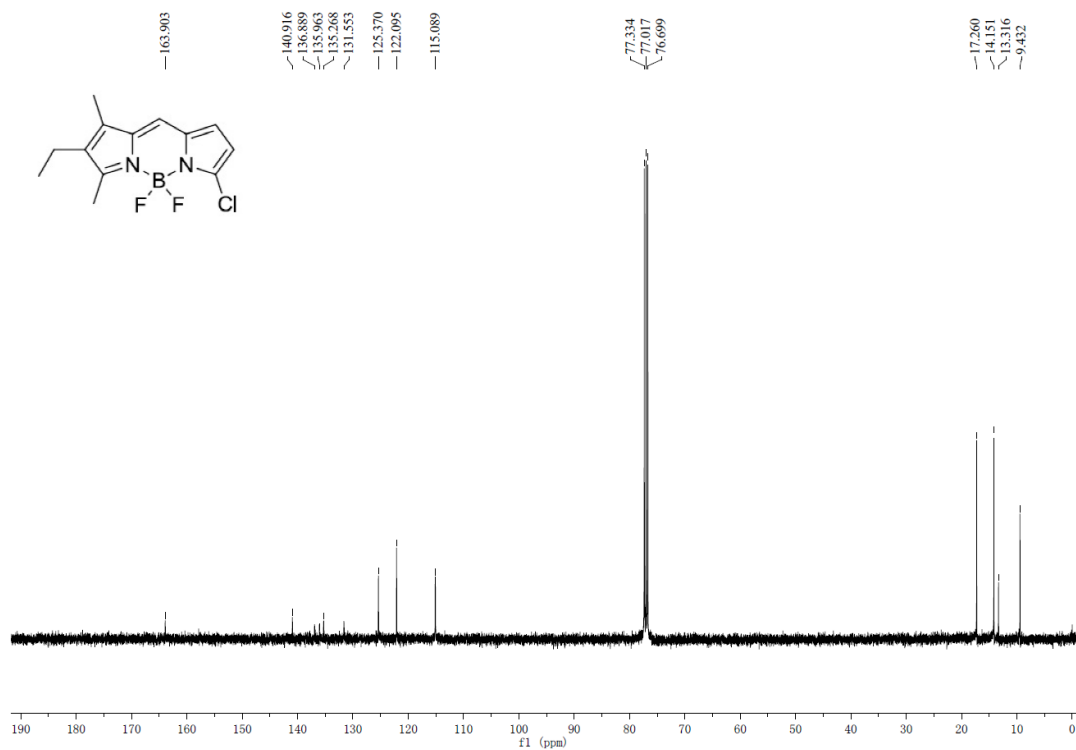

$^1\text{H}$  NMR spectra (400 MHz) of compound **3** in  $\text{CDCl}_3$  solution

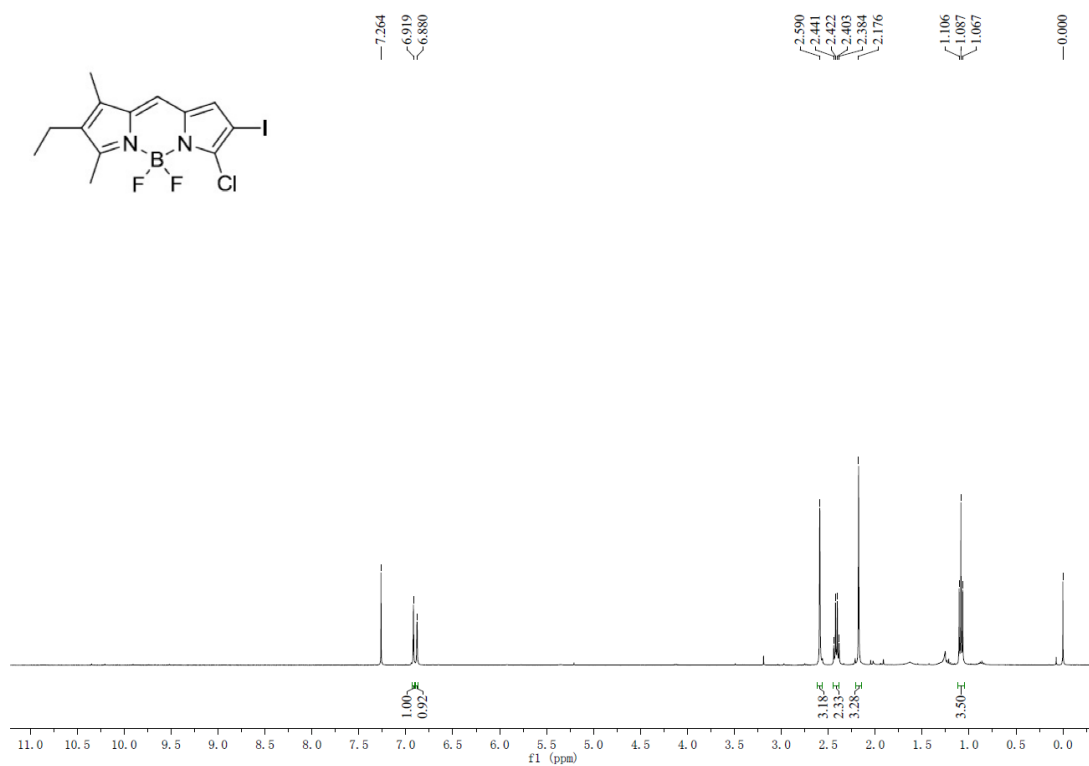

$^{13}\text{C}$  NMR spectra (100 MHz) of compound **3** in  $\text{CDCl}_3$  solution

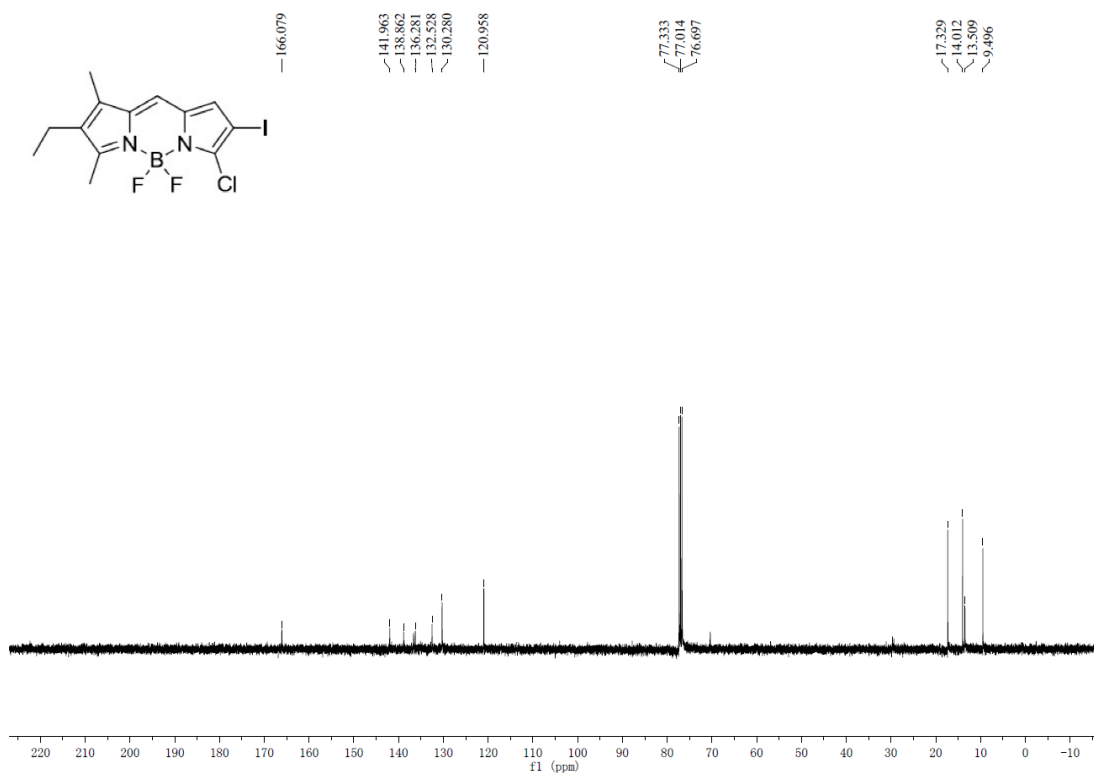

$^1\text{H}$  NMR spectra (400 MHz) of probe **HS** in  $\text{CDCl}_3$  solution

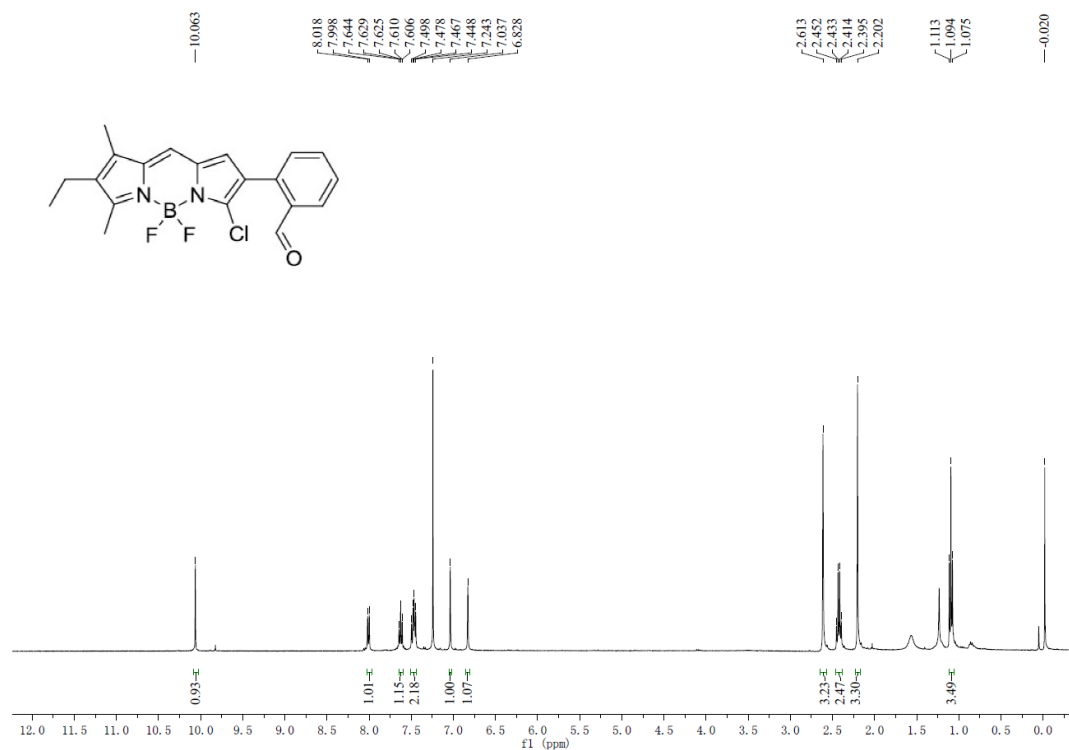

$^{13}\text{C}$  NMR spectra (100 MHz) of probe **HS** in  $\text{CDCl}_3$  solution

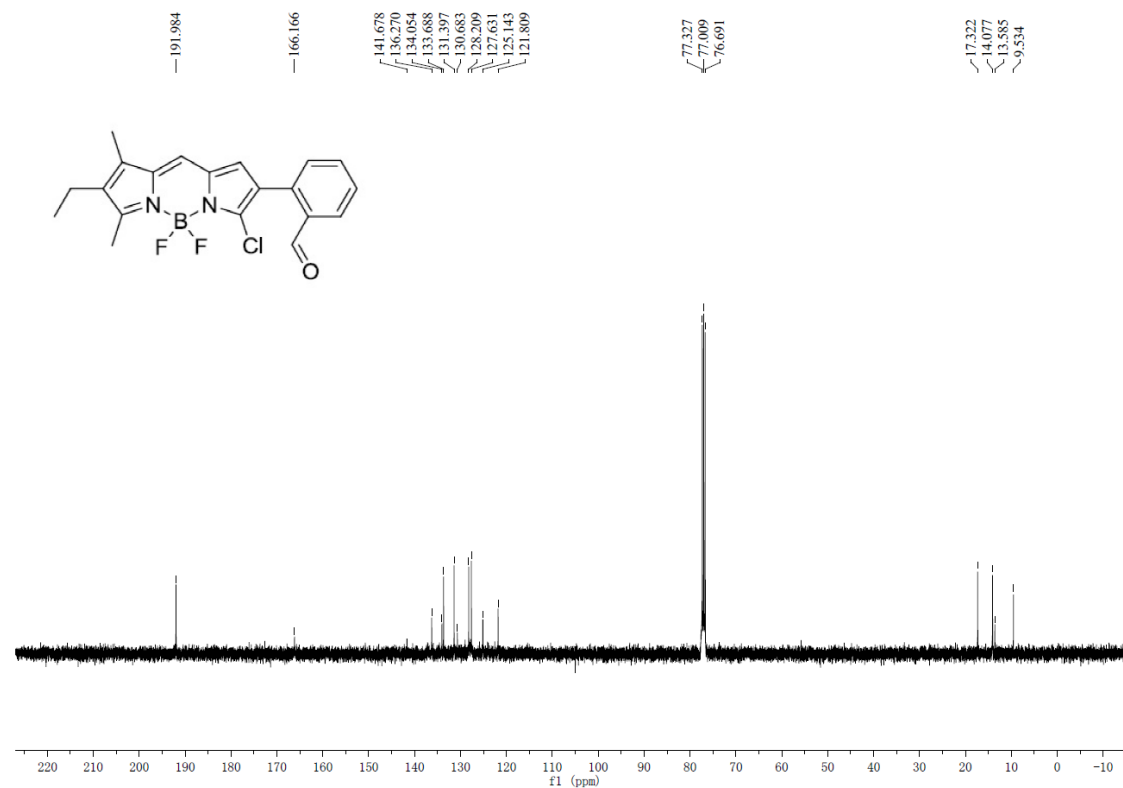

Supplement: s1 [file s1]
